# Supplementary material
Source: PubMed Central journal article supplement (PMC8058445)
Supplement: mmc1.pdf [file mmc1.pdf]

## **Supplemental Information**

### **Leukemic extracellular vesicles induce chimeric antigen receptor T cell dysfunction in chronic lymphocytic leukemia**

**Michelle J. Cox, Fabrice Lucien, Reona Sakemura, Justin C. Boysen, Yohan Kim, Paulina Horvei, Claudia Manriquez Roman, Michael J. Hansen, Erin E. Tapper, Elizabeth L. Siegler, Cynthia Forsman, Sydney B. Crotts, Kendall J. Schick, Mehrdad Hefazi, Michael W. Ruff, Ismail Can, Mohamad Adada, Evandro Bezerra, Lionel Aurelien Kankeu Fonkoua, Wendy K. Nevala, Esteban Braggio, Wei Ding, Sameer A. Parikh, Neil E. Kay, and Saad S. Kenderian**

| <b>Table S1. Characteristics of Untreated CLL Patients.</b> |             |                  |                    |            |                               |
|-------------------------------------------------------------|-------------|------------------|--------------------|------------|-------------------------------|
| <b>ID</b>                                                   | <b>FISH</b> | <b>RAI Stage</b> | <b>IgVH Status</b> | <b>Sex</b> | <b>EV(x10<sup>6</sup>)/uL</b> |
| 1                                                           | 13q         | 0                | unmutated          | male       | 30.2                          |
| 2                                                           | 13q         | IV               | mutated            | male       | 52.1                          |
| 3                                                           | 13q         | 0                | unmutated          | male       | 48.1                          |
| 4                                                           | 13q         | II               | unmutated          | male       | 20.9                          |
| 5                                                           | 13q         | 0                | -                  | female     | 44.4                          |
| 6                                                           | -           | I                | -                  | female     | 12.6                          |
| 7                                                           | 11q         | 0                | unmutated          | male       | 20.9                          |
| 8                                                           | Normal      | 0                | mutated            | male       | 18.4                          |
| 9                                                           | 11q         | 0                | mutated            | male       | 38.8                          |
| 10                                                          | 13q         | 0                | mutated            | male       | 23.2                          |
| 11                                                          | Normal      | -                | mutated            | female     | 14.2                          |
| 12                                                          | Normal      | 0                | mutated            | male       | 10.8                          |
| 13                                                          | 13q         | 0                | -                  | male       | 9.1                           |
| 14                                                          | Normal      | 0                | -                  | female     | 26.8                          |
| 15                                                          | Tri-12      | -                | mutated            | female     | 43.6                          |
| 16                                                          | -           | 0                | -                  | male       | 32.9                          |
| 17                                                          | 13q         | 0                | mutated            | male       | 58.0                          |
| 18                                                          | -           | I                | -                  | female     | 56.3                          |
| 19                                                          | -           | 0                | -                  | female     | 5.5                           |
| 20                                                          | 13q         | 0                | -                  | male       | 16.4                          |
| 21                                                          | -           | I                | unmutated          | male       | 13.4                          |
| 22                                                          | -           | I                | unmutated          | male       | 26.7                          |
| 23                                                          | 13q         | 0                | uninterpretable    | male       | 12.4                          |
| 24                                                          | 13q         | IV               | mutated            | female     | 17.2                          |
| 25                                                          | Normal      | IV               | mutated            | male       | 27.9                          |
| 26                                                          | 13q         | 0                | mutated            | male       | 20.6                          |
| 27                                                          | -           | II               | -                  | male       | 30.3                          |
| 28                                                          | Normal      | 0                | mutated            | male       | 17.4                          |
| 29                                                          | 13q         | 0                | mutated            | male       | 36.2                          |
| 30                                                          | -           | I                | -                  | male       | 16.8                          |
| 31                                                          | Normal      | 0                | mutated            | male       | 20.3                          |
| 32                                                          | -           | 0                | mutated            | male       | 62.4                          |
| 33                                                          | Normal      | I                | unmutated          | male       | 52.9                          |
| 34                                                          | 13q         | 0                | unmutated          | female     | 18.6                          |
| 35                                                          | Tri-12      | 0                | unmutated          | male       | 21.7                          |
| 36                                                          | -           | 0                | mutated            | female     | 33.1                          |
| 37                                                          | 13q         | 0                | mutated            | male       | 19.3                          |
| 38                                                          | 13q         | 0                | mutated            | female     | 66.6                          |
| 39                                                          | 13q         | II               | mutated            | female     | 27.5                          |
| 40                                                          | Normal      | 0                | unmutated          | male       | 25.2                          |
| 41                                                          | 13q         | 0                | mutated            | female     | 10.6                          |
| 42                                                          | 13q         | 0                | unmutated          | male       | 31.0                          |
| 43                                                          | 13q         | 0                | mutated            | female     | 10.8                          |
| 44                                                          | Normal      | 0                | mutated            | female     | 10.0                          |
| 45                                                          | 13q         | 0                | mutated            | male       | 29.3                          |
| 46                                                          | 13q         | 0                | mutated            | female     | 17.1                          |
| 47                                                          | -           | 0                | mutated            | male       | 50.7                          |
| 48                                                          | -           | 0                | -                  | male       | 34.6                          |
| 49                                                          | 13q         | 0                | unmutated          | male       | 60.9                          |
| 50                                                          | Normal      | 0                | unmutated          | male       | 130.0                         |

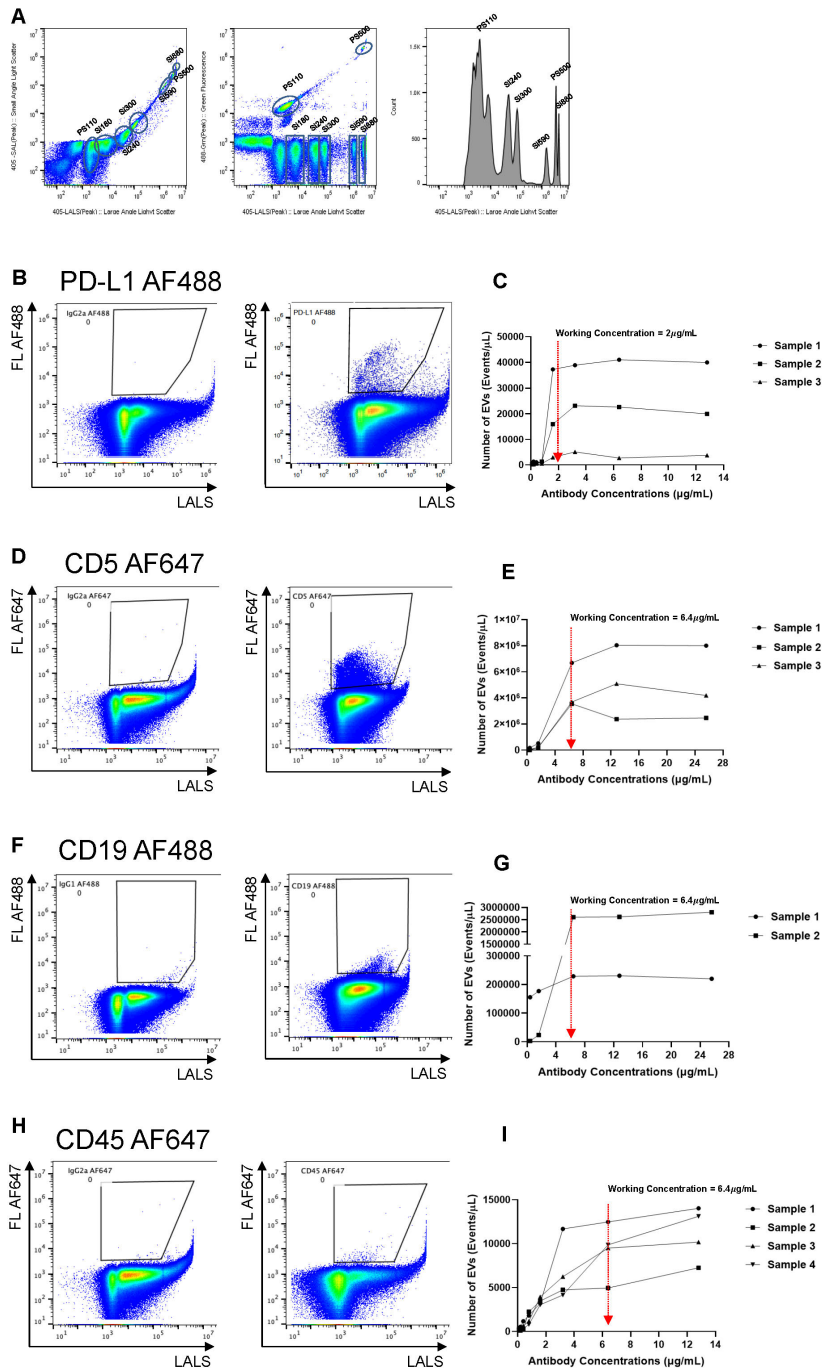

**Supplemental Fig. S1 | Nanoscale flow cytometric detection of EV subpopulations from platelet-poor plasma.** **A)** Representative scatterplots of a polystyrene and silica bead mixture detected by nanoscale flow cytometry. Two fluorescent polystyrene bead populations PS110=110nm, PS500=500nm and 5 silica bead populations (180, 240, 300, 590, 880 nm). Left panel represents light-scatter detection with LALS in X-axis and SALS in Y-axis. Middle panel represents LALS in X-axis and fluorescence (FL488) in Y-axis. Right panel represents LALS in X-axis and bead count in Y-axis. **B-I)** Representative scatterplots of a platelet-poor plasma sample incubated with fluorescent antibodies against PD-L1 (**B**), CD5 (**D**), CD19 (**F**), CD45 (**H**) or antibody-matched isotypes. Gates represent events acquired as EVs positive for each marker. Antibody titration curves (**C**, **E**, **G**, **I**) were obtained from nanoscale flow cytometric detection of EVs from normal individual-derived platelet-poor plasma (n=2-4) incubated with increasing concentrations of antibodies or antibody-matched isotypes. Red arrows indicate antibody concentrations used for EV immunophenotyping of patient plasma.

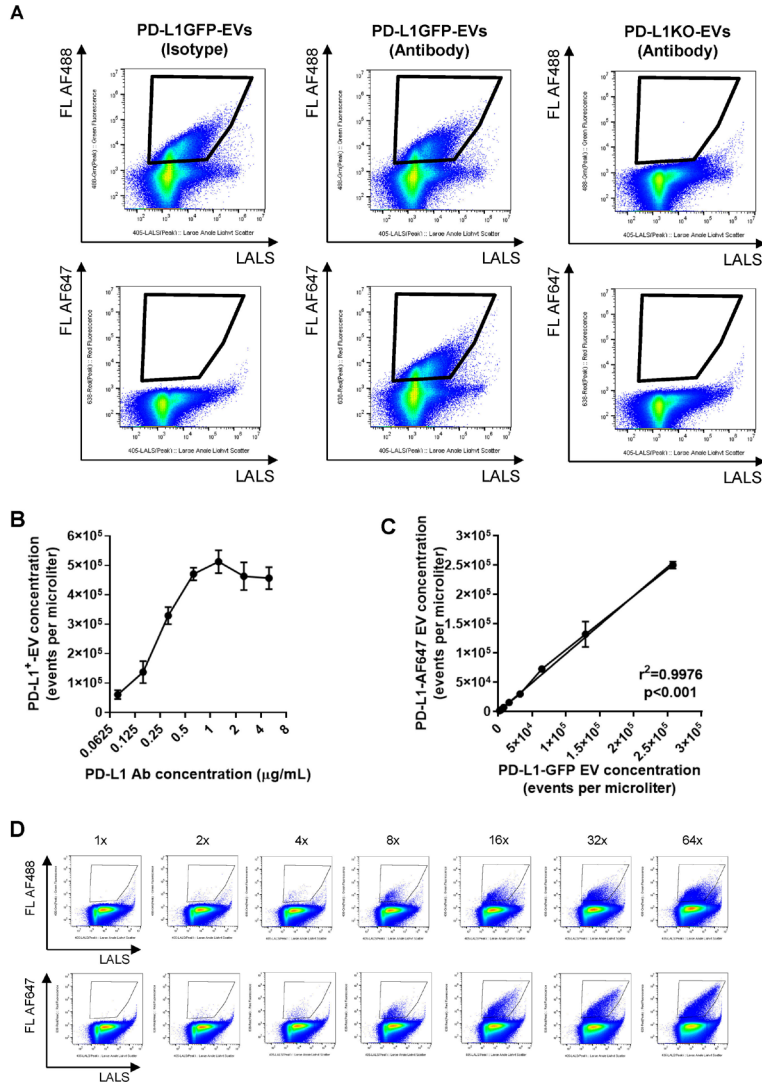

**Supplemental Fig. S2 | Evaluation of the performance of nanoscale flow cytometric detection of PD-L1-positive EVs from patient plasma. A)** Scatterplots of nanoscale flow cytometric detection of PD-L1-positive EVs isolated from 786-O cells overexpressing PD-L1GFP. PD-L1GFP-positive EVs were incubated with antibody-matched isotype (left panel) or anti-PD-L1 (middle panel). EVs isolated from PD-L1 knockout cells were used as negative control (right panel). **B)** Antibody titration curve for PD-L1 antibody using PD-L1<sup>+</sup>-EVs isolated from 786O cells. A fixed concentration of approximately 500,000 PD-L1<sup>+</sup>-EVs determined by nanoscale flow cytometry was used as reference. **C)** Linear regression model showing correlation between concentrations of PD-L1GFP-EVs and antibody-labeled PD-L1EVs from dilutions of PD-L1GFP-EVs spiked-in 3 platelet-poor plasma (normal individuals). Coefficient of determination ( $r^2$ ) and one-tailed p-value test was performed. **D)** Representative scatterplots of nanoscale flow cytometric detection of PD-L1-positive EVs spiked-in a platelet-poor plasma. Scatterplots for GFP detection (upper row) and antibody detection (lower row) are shown.

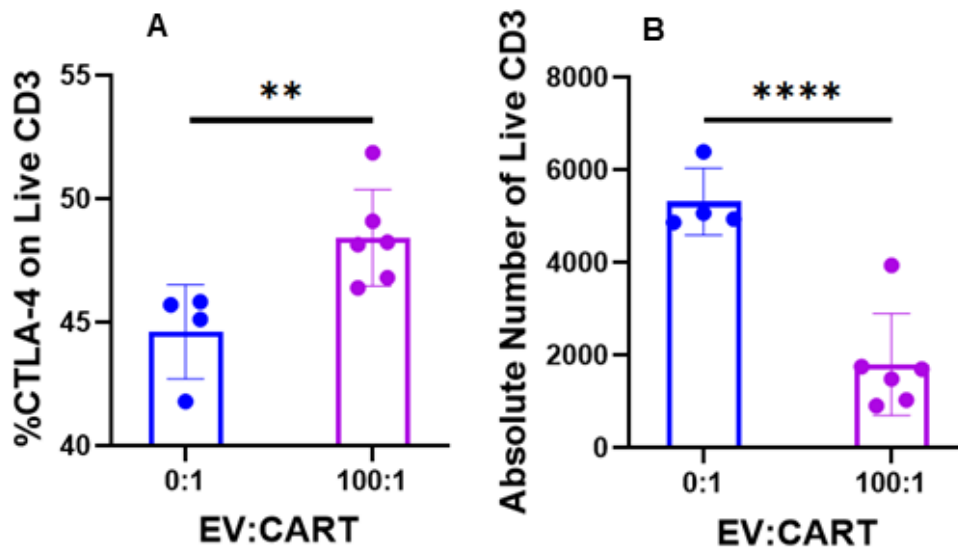

**Supplemental Fig. S3 | CLL-Derived EVs impact TCR-specific proliferation and inhibitory receptor modulation of CART19 cells. A)** Inhibitory receptor expression on CART cells activated by CD3:CD28 beads is upregulated by CLL-derived EVs. CART19 were co-cultured for 24 hours with a 3:1 bead:cell ratio and 100:1 EV:CART (\*\*  $p < 0.01$ , one-way ANOVA; error bars, SEM; 3 biological and 2 technical replicates, 2 experiments). **B)** TCR-specific proliferation of CART19 is significantly decreased after 6 hours of co-culture with CLL-derived EVs. CART19 were co-cultured for 24 hours with a 3:1 bead:cell ratio and 100:1 EV:CART (\*\*\*\*  $p < 0.0001$ , one-way ANOVA; error bars, SEM; 3 biological and 2 technical replicates, 2 experiments).



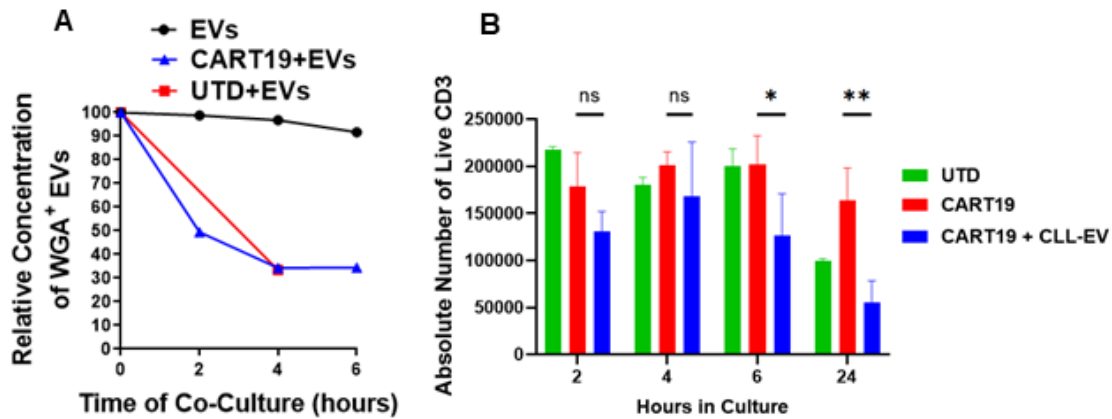

**Supplemental Fig. S5 | CLL-Derived EVs significantly impact antigen-specific proliferation of CART19 cells after 6 hours of co-culture. A)** EV concentration declines in the presence of CART19 or untransduced T (UTD) cells within 2-to-6 hours of co-culture. EVs, CART19 or UTD, and CLL B cells co-cultured at a 100:1:1 ratio. Percentage of EVs in suspension measured by nanoscale flow cytometry at 0, 2, 4, and 6 hours. **B)** Antigen-specific proliferation of CART19 is significantly decreased after 6 hours of co-culture with CLL-derived EVs. EVs were co-cultured with CART19 cells at a 100:1 ratio for 0, 2, 6, and 24 hours and then activated with the CD19<sup>+</sup> cell line JeKo-1.

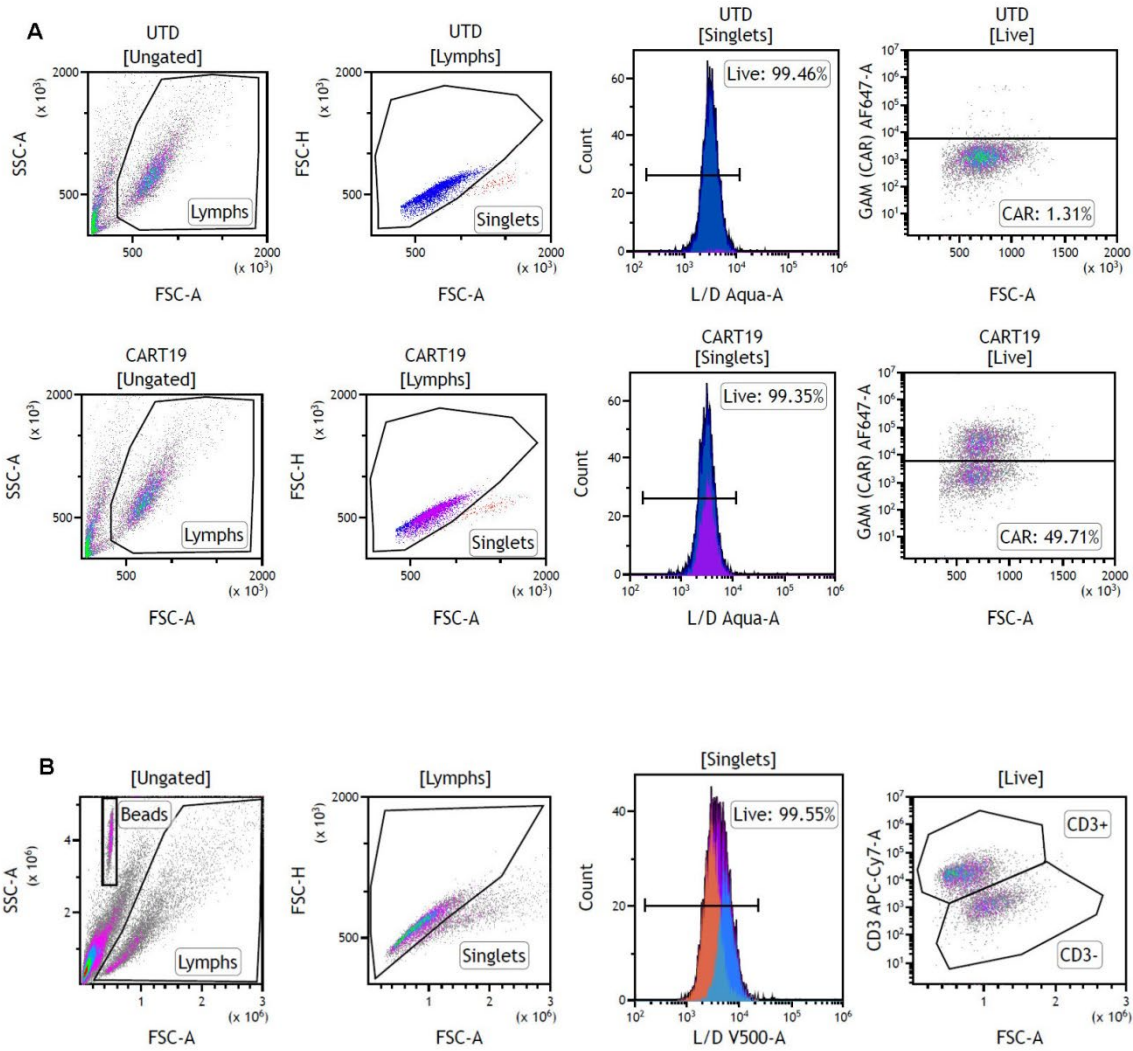

|                      |         |
|----------------------|---------|
| Volume Acquired (uL) | 90.00   |
| Bead Events          | 2366    |
| CD3+ Events          | 3402    |
| Abs CD3+ (vol)       | 7560.27 |
| Abs CD3+ (beads)     | 7764.50 |
| CD3- Events          | 2295    |
| Abs CD3- (vol)       | 5100.18 |
| Abs CD3- (beads)     | 5237.95 |

$$\frac{\#events (population)}{volume\ acquired\ (uL)} \times total\ volume\ (uL) = absolute\ number\ of\ cells\ (vol)$$

$$\frac{\#events (population)}{\#bead\ events} \times \frac{\#beads\ added}{total\ volume\ (uL)} \times total\ volume\ (uL) = absolute\ number\ of\ cells\ (beads)$$

**Supplemental Fig. S6 | Gating strategy for flow cytometry. A)** Gating strategy to measure CAR expression on T cells. Goat anti-mouse F(ab')<sub>2</sub> antibody (GAM) was used with live/dead aqua to detect CAR expression on CART19 cells. Cells were gated on FSC/SSC followed by singlet discrimination and live cells. Negative gates for CAR expression were set based on untransduced (UTD) T cells. **B)** Gating strategy to quantify CART19 cells and target cells. Cells were gated on FSC/SSC followed by singlet and live cell discrimination. CD3 and FSC were used to separate CART19 cells from target cells. Absolute quantification was performed using volumetric measurement. Calculations for both volumetric and bead quantification using CountBright beads are shown.
